# Supplementary material for: Computational and experimental studies on the effect of hydrogenation of Ni-doped TiO2 anatase nanoparticles for the application of water splitting
Source: Royal Society of Chemistry journal article supplement (doi:10.1039/c5ra16119c), 2015-01-01
Supplement: c5ra16119c1.pdf [file c5ra16119c1.pdf]

### Supporting Information

We conducted the hydrogenation of Ni-doped TiO<sub>2</sub> samples using the homemade low-pressure hydrogenation system as shown in the Figure below.

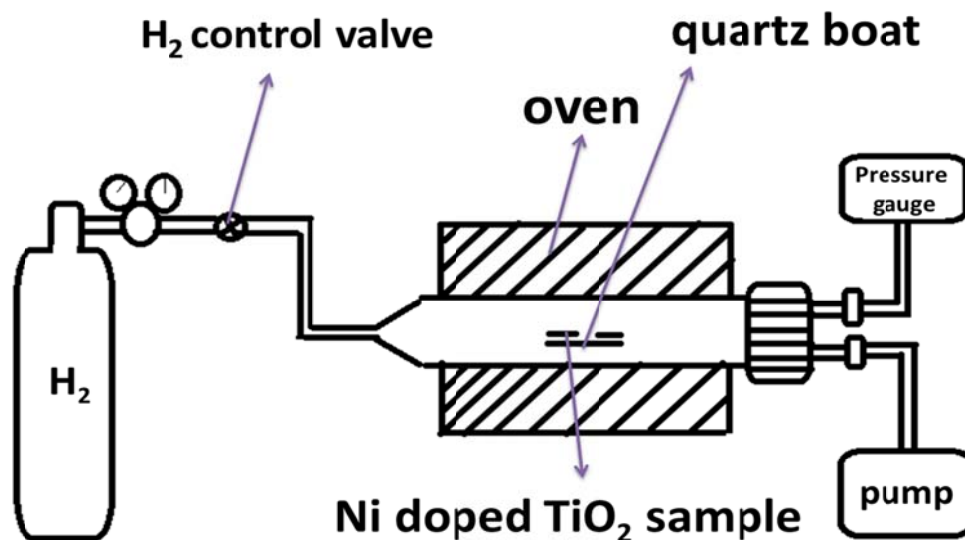

In the hydrogenation reaction, Ni doped TiO<sub>2</sub> samples were placed in a quartz boat. After evacuation, the system was purged with low-pressure H<sub>2</sub> for about five minutes; the H<sub>2</sub> pressure was then slowly increased to 800 Torr. The temperature of the oven was maintained at 300 °C for 3 hrs.

**Table S1:** Hydrogen production rates (mmol/g-Hr) of Ni-doped TiO<sub>2</sub> and hydrogenated Ni-doped TiO<sub>2</sub> with 0.5% and 5% Ni-doping NPs under 1-hr illumination using 10% ethanol as sacrificial agent and 2 W Xe-lamp output.

| Sample                                | 0.5% Ni Doped TiO <sub>2</sub> | 5% Ni Doped TiO <sub>2</sub> | H-0.5% Ni Doped TiO <sub>2</sub> | H-5% Ni Doped TiO <sub>2</sub> |
|---------------------------------------|--------------------------------|------------------------------|----------------------------------|--------------------------------|
| H <sub>2</sub> Production (mmol/g-Hr) | 0.17                           | 0.40                         | 0.25                             | 1.64                           |

**Table S2:** Comparison of predicted energies for the dissociative adsorption of H<sub>2</sub> and migration of H on 1- and 2-Ni doped TiO<sub>2</sub> and on undoped TiO<sub>2</sub> surfaces at the DFT+U level of theory.

| System                                                          | (1-2) Ni-TiO <sub>2</sub> | Undoped TiO <sub>2</sub> <sup>9</sup> |
|-----------------------------------------------------------------|---------------------------|---------------------------------------|
| <b>H<sub>2</sub>(g)+1Ni-TiO<sub>2</sub></b>                     | <b>0.0</b>                |                                       |
| H <sub>2</sub> ...1Ni-TiO <sub>2</sub> (a)                      | 0.9                       |                                       |
| TS1                                                             | 12.1                      |                                       |
| H-O <sub>3C</sub> , H-Ni-1Ni-TiO <sub>2</sub> (a)               | -16.6                     |                                       |
| TS2                                                             | -13.2                     |                                       |
| H-O <sub>3C</sub> ,H-O <sub>2C</sub> -1Ni-TiO <sub>2</sub> (a)  | -94.9                     |                                       |
|                                                                 |                           |                                       |
| <b>H<sub>2</sub>(g)+1Ni-TiO<sub>2</sub></b>                     | <b>0.0</b>                | <b>0.0</b>                            |
| H <sub>2</sub> ...O <sub>2C</sub> -1Ni-TiO <sub>2</sub> (a)     | 1.21                      | -0.3                                  |
| TS3                                                             | 6.1                       | 47.8                                  |
| 2H-O <sub>2C</sub> -1Ni-TiO <sub>2</sub> (a)                    | -98.2                     | -18.3                                 |
|                                                                 |                           |                                       |
| <b>H<sub>2</sub>(g)+2Ni-TiO<sub>2</sub></b>                     | <b>0.0</b>                |                                       |
| H <sub>2</sub> ...2Ni-TiO <sub>2</sub> (a)                      | 0.8                       |                                       |
| TS4                                                             | 17.4                      |                                       |
| H-O <sub>3C</sub> , H-Ni-2Ni-TiO <sub>2</sub> (a)               | -15.6                     |                                       |
| TS5                                                             | -14.6                     |                                       |
| H-O <sub>3C</sub> , H-O <sub>2C</sub> -2Ni-TiO <sub>2</sub> (a) | -92.5                     |                                       |
|                                                                 |                           |                                       |
| <b>H<sub>2</sub>(g)+2Ni-TiO<sub>2</sub></b>                     | <b>0.0</b>                | <b>0.0</b>                            |
| H <sub>2</sub> ...O <sub>2C</sub> -2Ni-TiO <sub>2</sub> (a)     | 0.2                       | -0.3                                  |
| TS6                                                             | 12.4                      | 47.8                                  |
| 2H-O <sub>2C</sub> -2Ni (a)                                     | -94.8                     | -18.3                                 |
| TS6a                                                            | -72.6                     | 2.5                                   |

|                                                 |       |      |
|-------------------------------------------------|-------|------|
| H-O <sub>3c</sub> ,H-O <sub>2c</sub> -2Ni (a)   | -79.7 | -8.7 |
| TS6b                                            | -64.8 | 9.9  |
| H-O <sub>sub2</sub> ,H-O <sub>2c</sub> -2Ni (a) | -81.0 | -9.5 |
| 2H-O <sub>sub2</sub> -2Ni (b)                   | -76.3 | 7.3  |
| TS6c                                            | -50.7 | 29.3 |
| H <sub>2</sub> O-2Ni(b)                         | -68.7 | 19.0 |

**Table S3:** Comparison of predicted energies for H-atom adsorption and migration on 1- and 2-Ni doped TiO<sub>2</sub> and those on the un-doped TiO<sub>2</sub> surface as well as those for 2H atoms on O<sub>2c</sub> sites and migration into the bulk at the DFT+U level of theory

| System                                      | 1Ni-TiO <sub>2</sub> | Undoped TiO <sub>2</sub> <sup>9</sup> |                                                |                      |                                       |
|---------------------------------------------|----------------------|---------------------------------------|------------------------------------------------|----------------------|---------------------------------------|
| H-O <sub>2c</sub> -1Ni-TiO <sub>2</sub> (a) | 0                    | 0                                     |                                                |                      |                                       |
| TS7                                         | 23.5                 | 27.8                                  |                                                |                      |                                       |
| H-O <sub>3c</sub> -1Ni-TiO <sub>2</sub> (a) | 18                   | 17.6                                  |                                                |                      |                                       |
| TS8                                         | 32.9                 | 35.6                                  |                                                |                      |                                       |
| H <sub>BD1</sub> -1Ni-TiO <sub>2</sub> (a)  | 14.3                 | 13.7                                  |                                                |                      |                                       |
| TS9                                         | 30.3                 |                                       |                                                |                      |                                       |
| H <sub>BD2</sub> -1Ni-TiO <sub>2</sub> (a)  | 21                   |                                       |                                                |                      |                                       |
|                                             |                      |                                       |                                                |                      |                                       |
| System                                      | 2Ni-TiO <sub>2</sub> | Undoped TiO <sub>2</sub> <sup>9</sup> | System                                         | 2Ni-TiO <sub>2</sub> | Undoped TiO <sub>2</sub> <sup>9</sup> |
| H-O <sub>2c</sub> -2Ni-TiO <sub>2</sub> (a) | 0.0                  | 0.0                                   | 2H-O <sub>2c</sub> -2Ni(a)                     | 0.0                  | 0.0                                   |
| TS10                                        | 22.7                 | 27.8                                  | TS6a                                           | 22.2                 | 20.8                                  |
| H-O <sub>3c</sub> -2Ni-TiO <sub>2</sub> (a) | 18.2                 | 17.6                                  | H-O <sub>3c</sub> ,H-O <sub>2c</sub> -2Ni(a)   | 15.1                 | 9.6                                   |
| TS11                                        | 33                   | 35.6                                  | TS6b                                           | 30.0                 | 28.2                                  |
| H <sub>BD1</sub> -2Ni-TiO <sub>2</sub> (a)  | 15                   | 14.33                                 | H-O <sub>BD1</sub> ,H-O <sub>2c</sub> -2Ni(a)  | 13.8                 | 14.2                                  |
| TS12                                        | 29.6                 |                                       | TS6b1                                          | 16.4                 | 20.0                                  |
| H <sub>BD2</sub> -2Ni-TiO <sub>2</sub> (a)  | 19.9                 |                                       | H-O <sub>sub2</sub> ,H-O <sub>2c</sub> -2Ni(a) | 4.8                  | 8.8                                   |
|                                             |                      |                                       | 2H-O <sub>sub2</sub> -2Ni(b)                   | 18.5                 | 25.6                                  |
|                                             |                      |                                       | TS6c                                           | 44.1                 | 47.6                                  |

|  |  |  |                         |      |      |
|--|--|--|-------------------------|------|------|
|  |  |  | H <sub>2</sub> O-2Ni(b) | 26.1 | 37.3 |
|--|--|--|-------------------------|------|------|

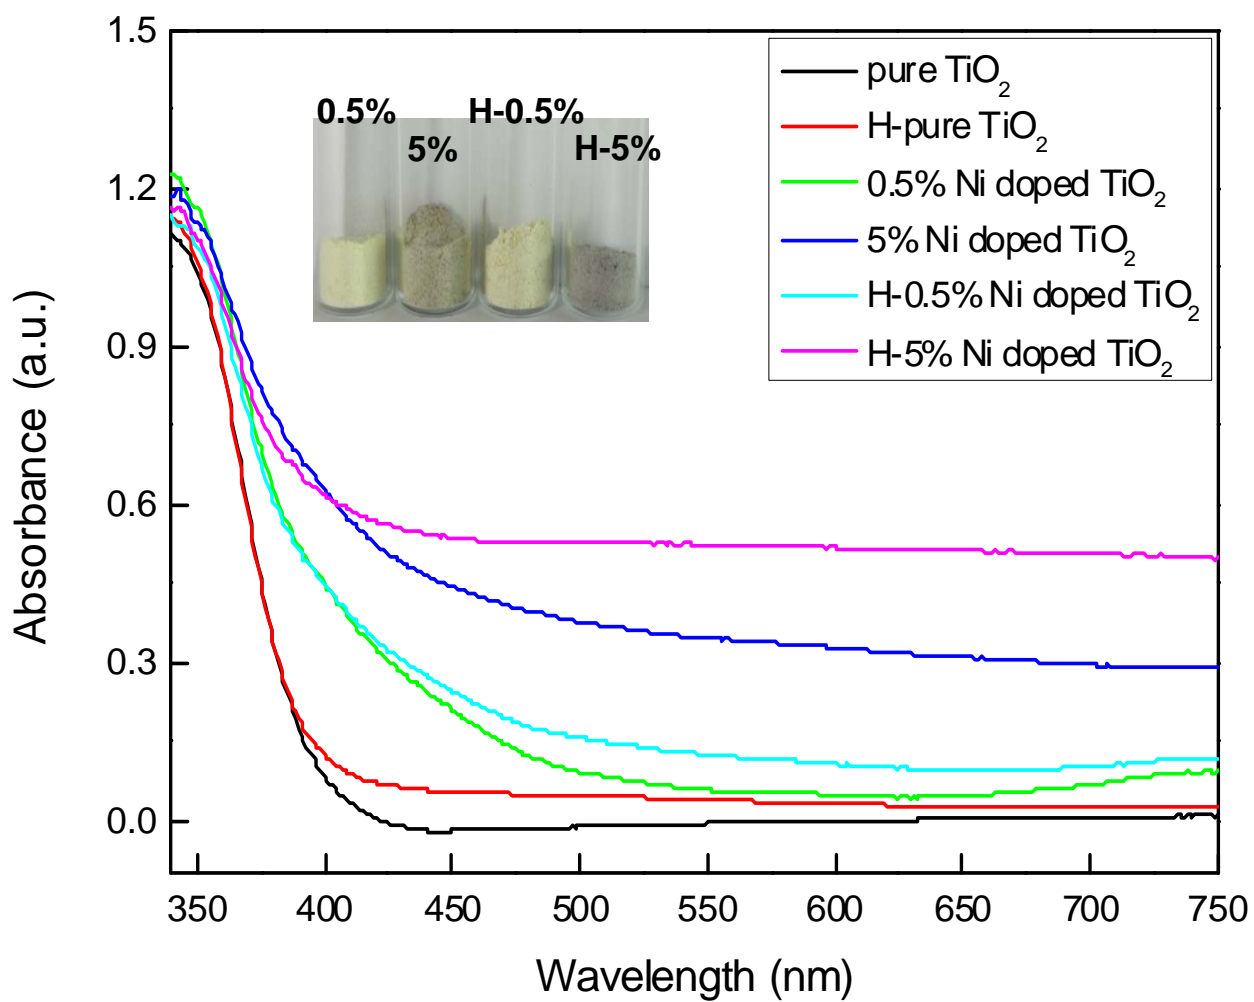

**Figure S1.** The picture of Ni doped TiO<sub>2</sub> powders and the UV-Vis absorption spectra of the powders.

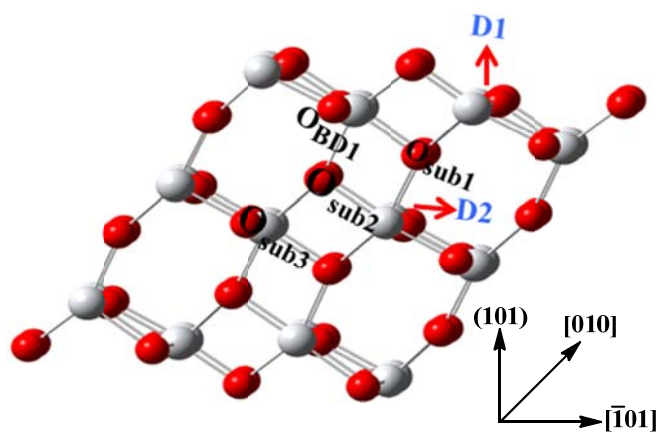

TiO<sub>2</sub> side view

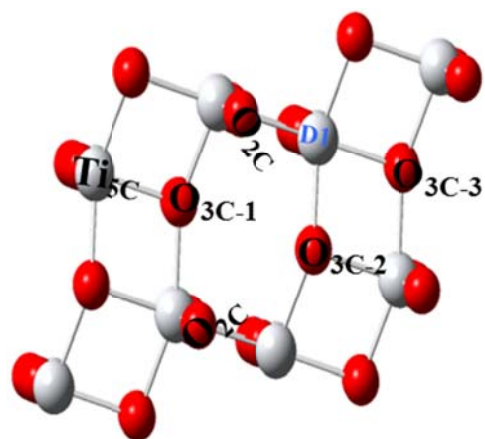

TiO<sub>2</sub> top view

**Figure S2.** Perspective view of the TiO<sub>2</sub>(101) surface slab model used in the present study.

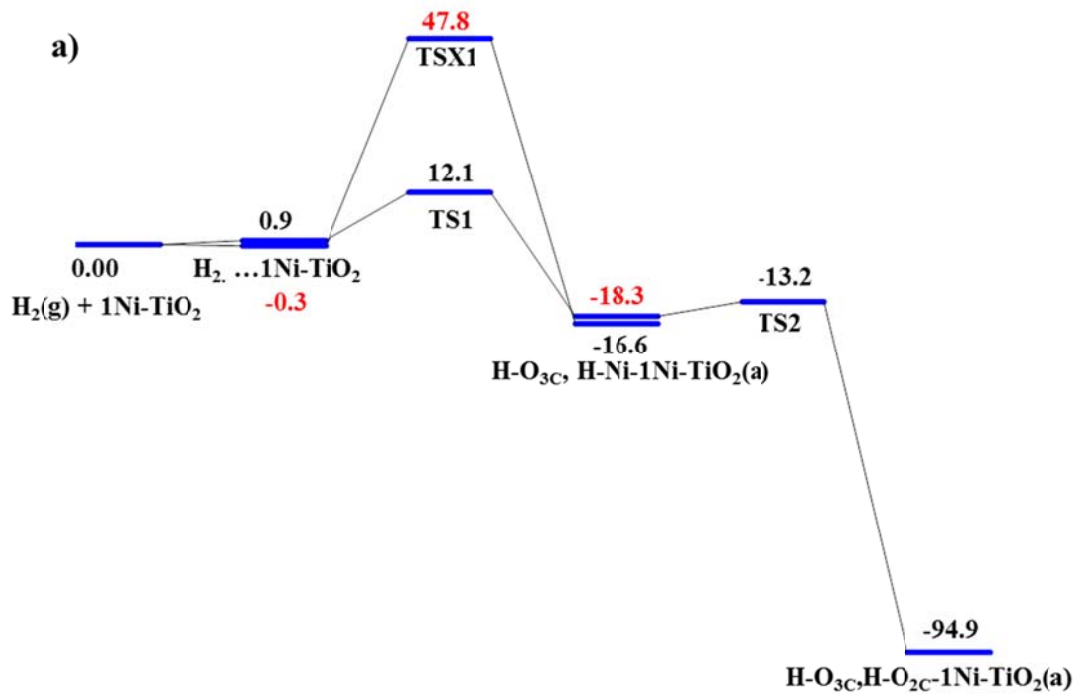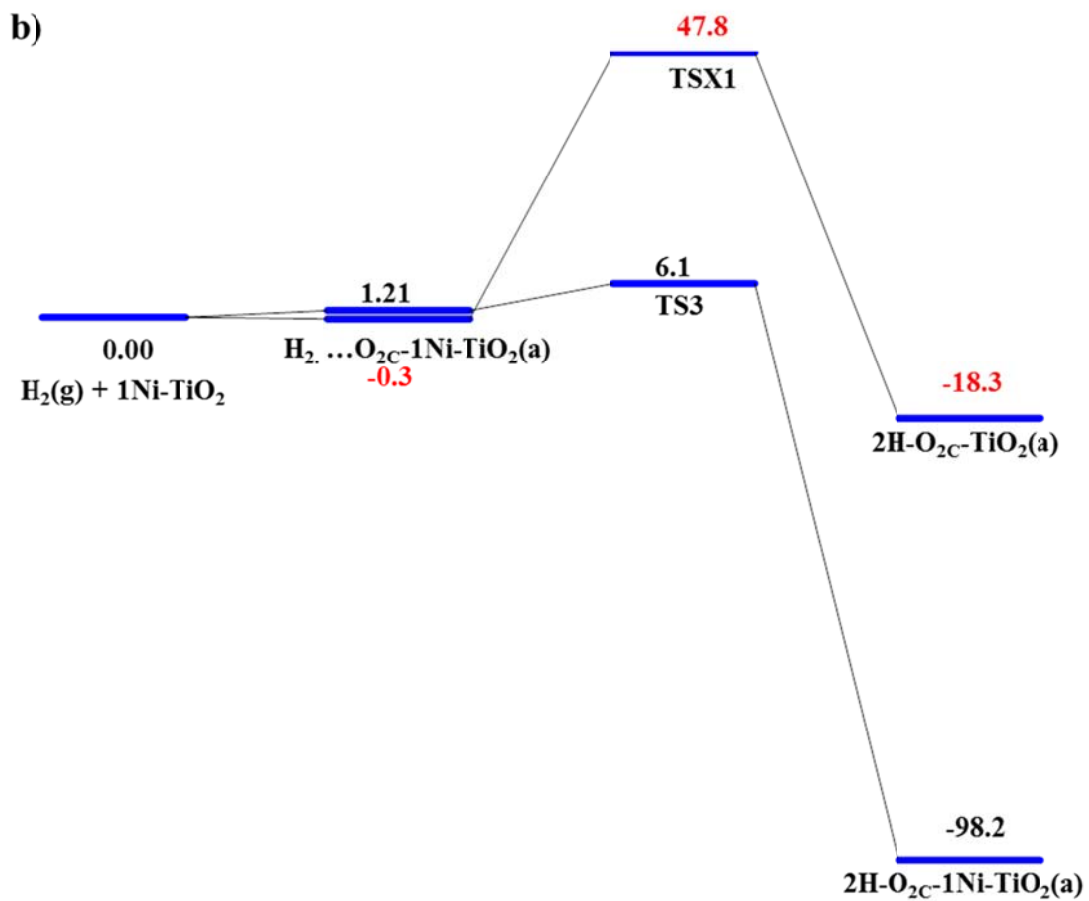

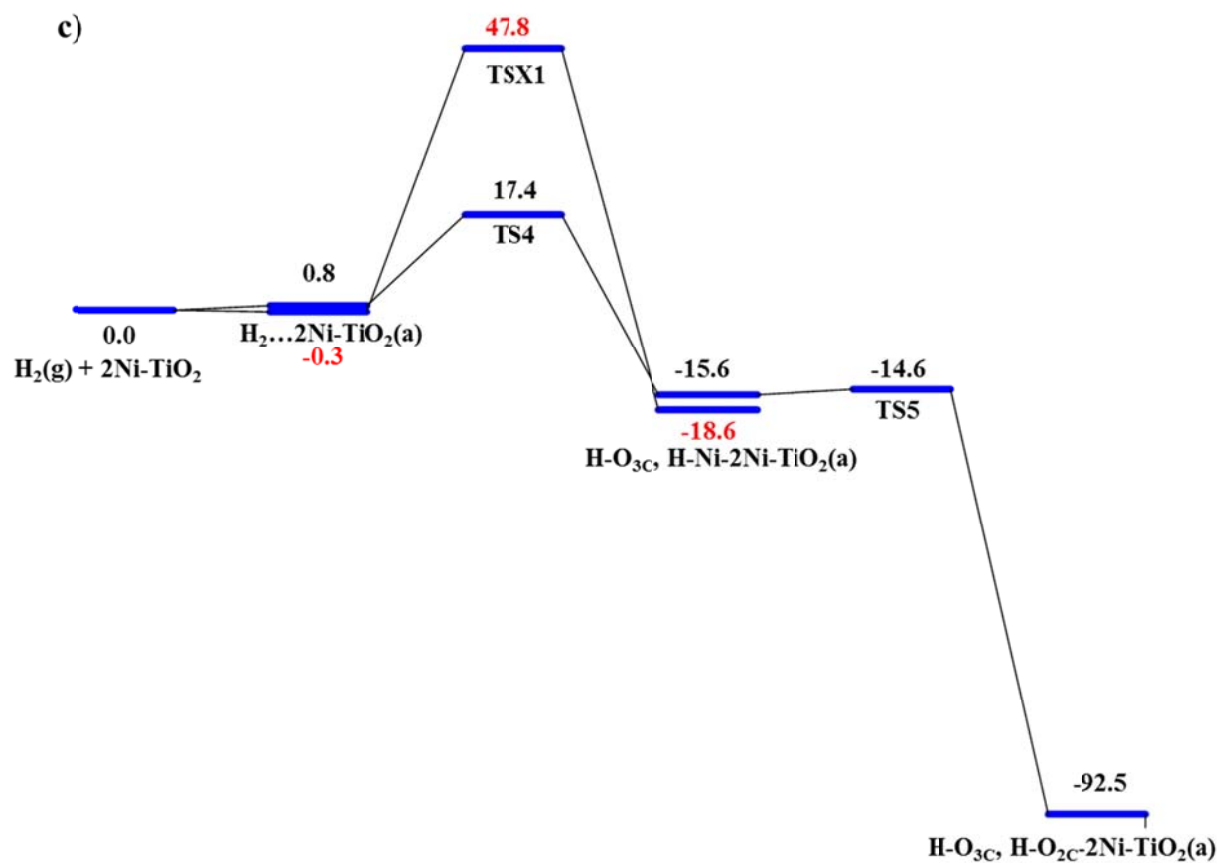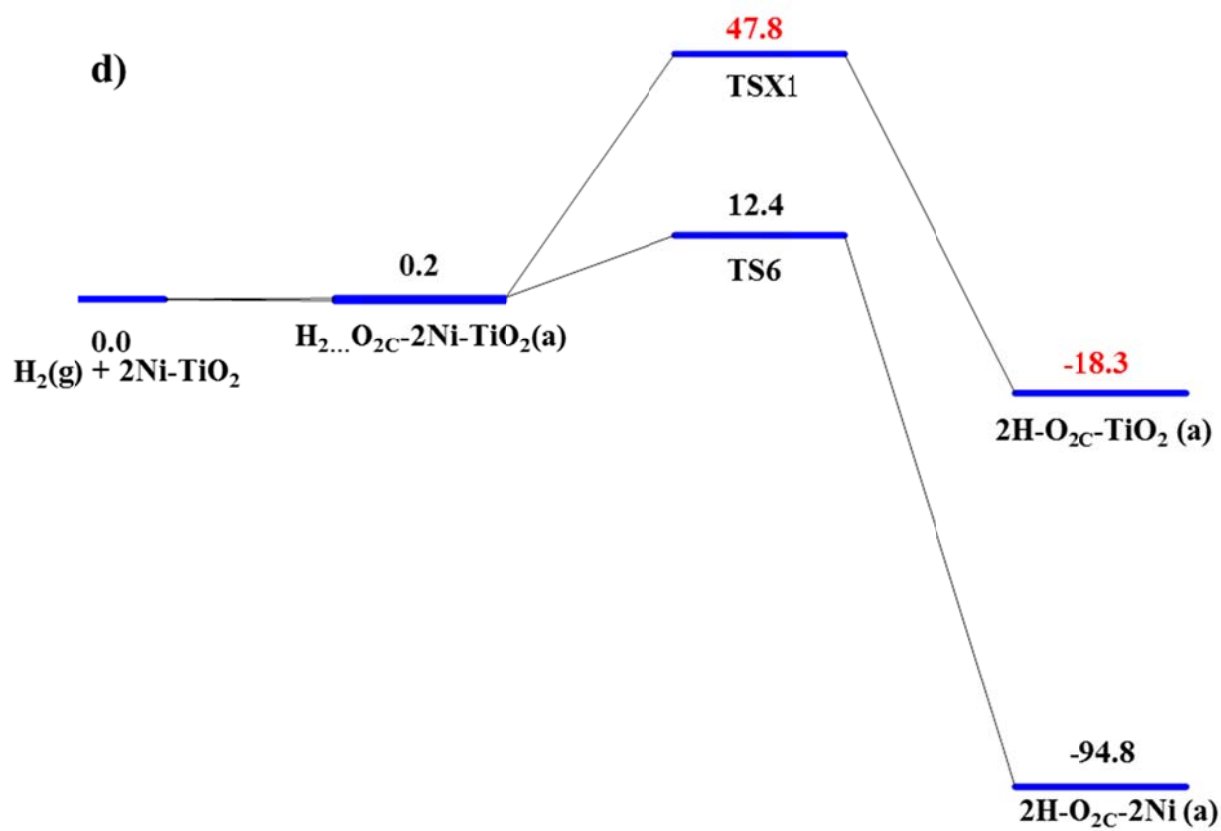

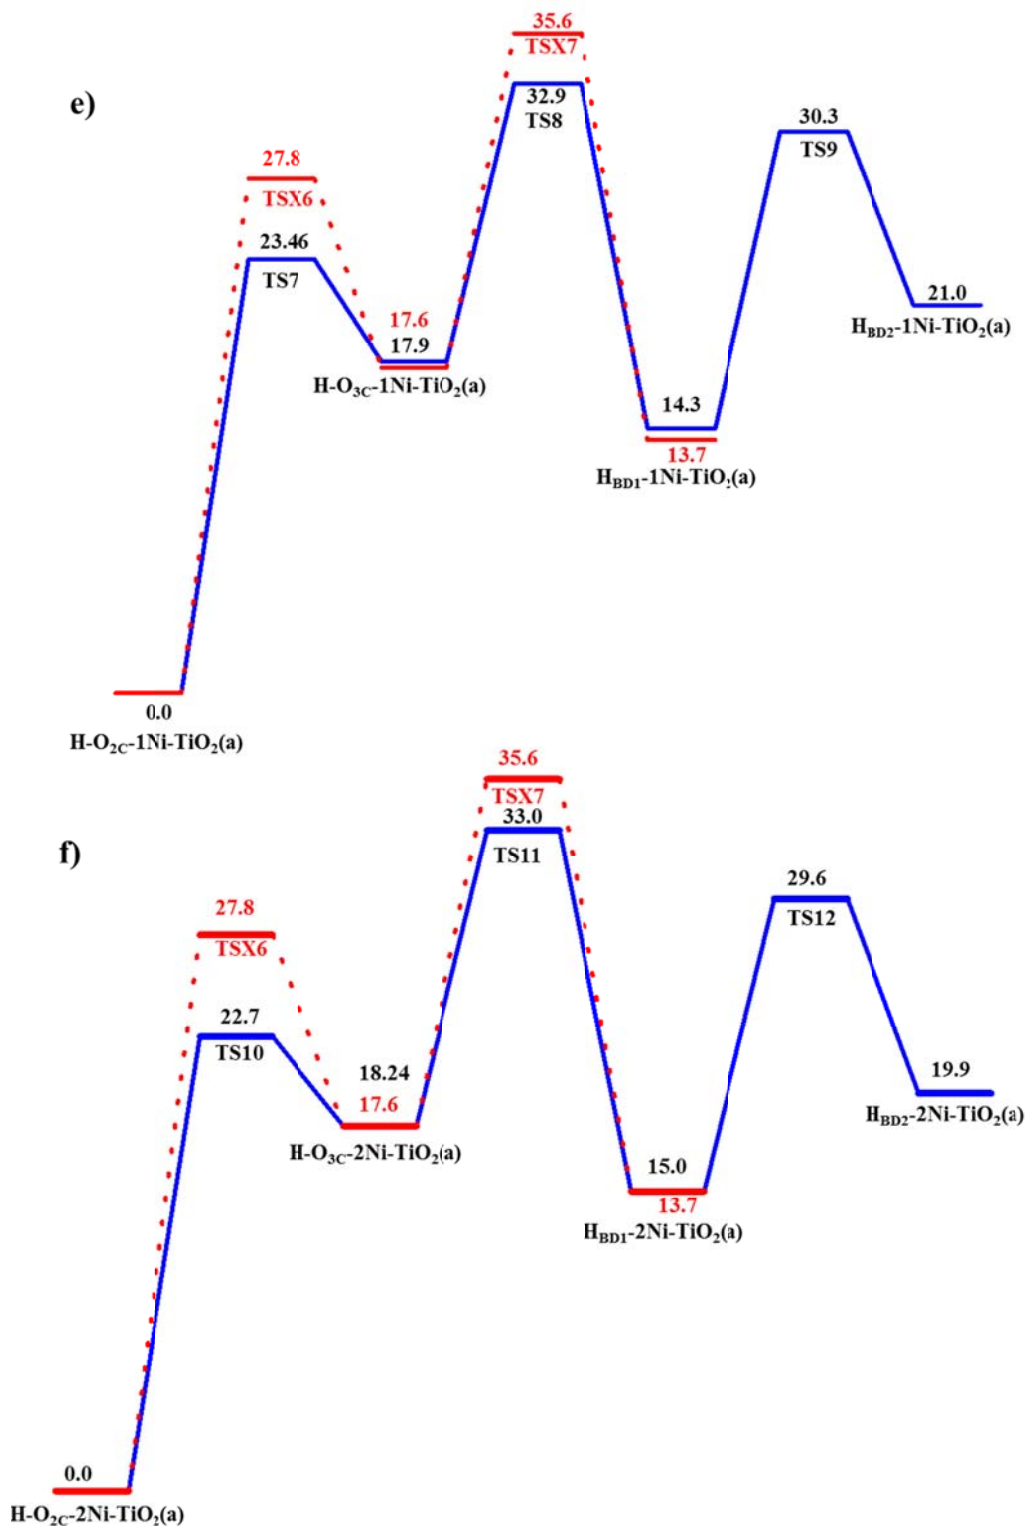

**Figure S3.** Calculated potential energy diagrams for (a) H<sub>2</sub> dissociation on 1Ni doped TiO<sub>2</sub> surface (on Ni site), (b) H<sub>2</sub> dissociation on the Ni-doped TiO<sub>2</sub> surface (at O<sub>2C</sub> site), (c) H<sub>2</sub> dissociation on the 2Ni-doped TiO<sub>2</sub> surface (at Ni site) (d) H<sub>2</sub> dissociation on the 2Ni-doped TiO<sub>2</sub> surface (at O<sub>2C</sub> site), (e) H migration on the 1Ni-doped TiO<sub>2</sub> from the O<sub>2C</sub> site to bulk, (f) H migration on the 2Ni-doped TiO<sub>2</sub> from the O<sub>2C</sub> site to bulk. The results of H<sub>2</sub> dissociation and migration on undoped TiO<sub>2</sub>(101) shown in red color are taken from Raghunath et al.<sup>9</sup>



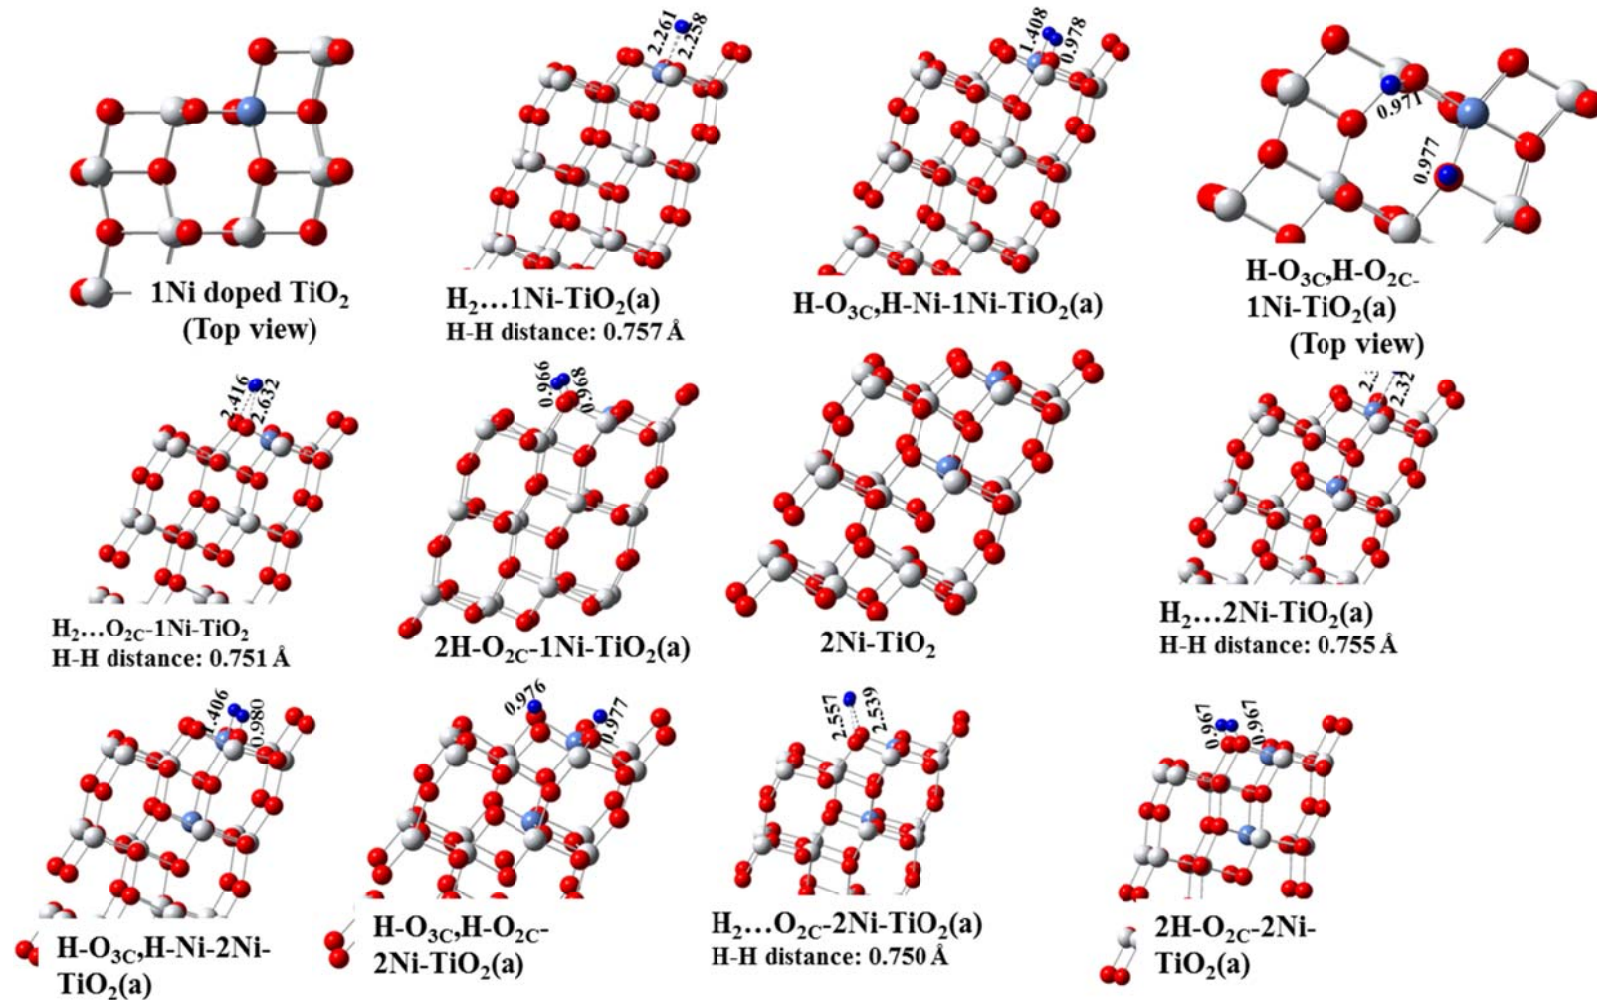

**Figure S4.** Optimized configurations of  $\text{TiO}_2$ , H and  $\text{H}_2$  on (1 to 2) Ni- $\text{TiO}_2$  (101). (Grey: Titanium; Red: Oxygen; Royal Blue: Nickel; Blue: Hydrogen). The distance (Å) between the surface and H are shown in the optimized structure.

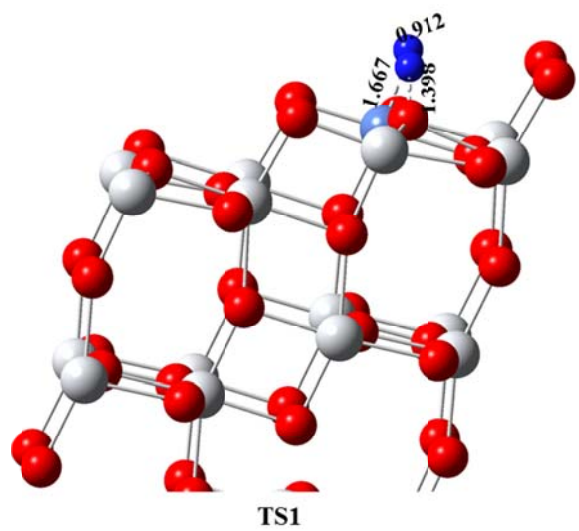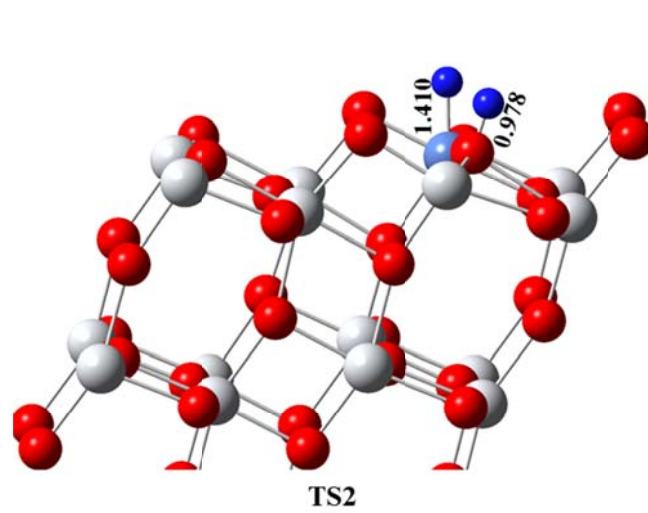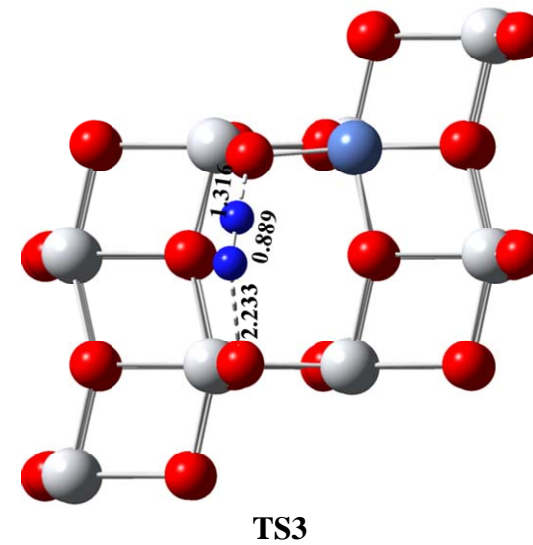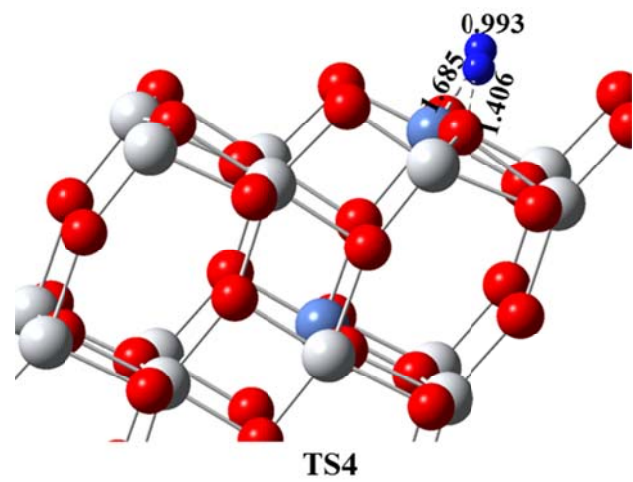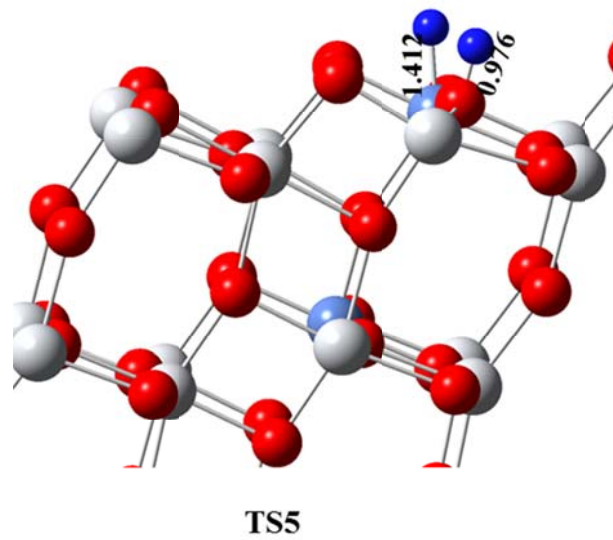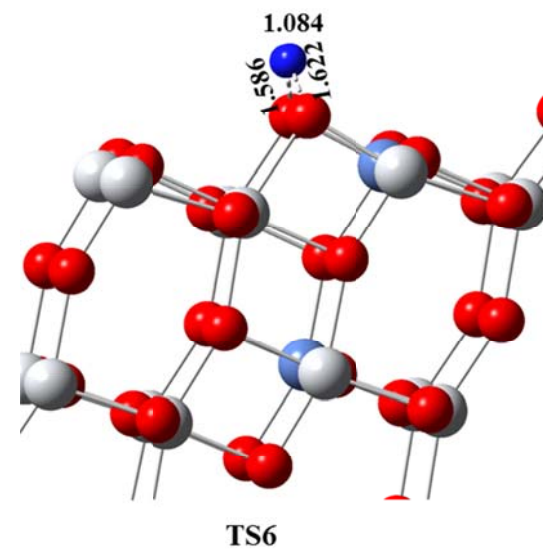

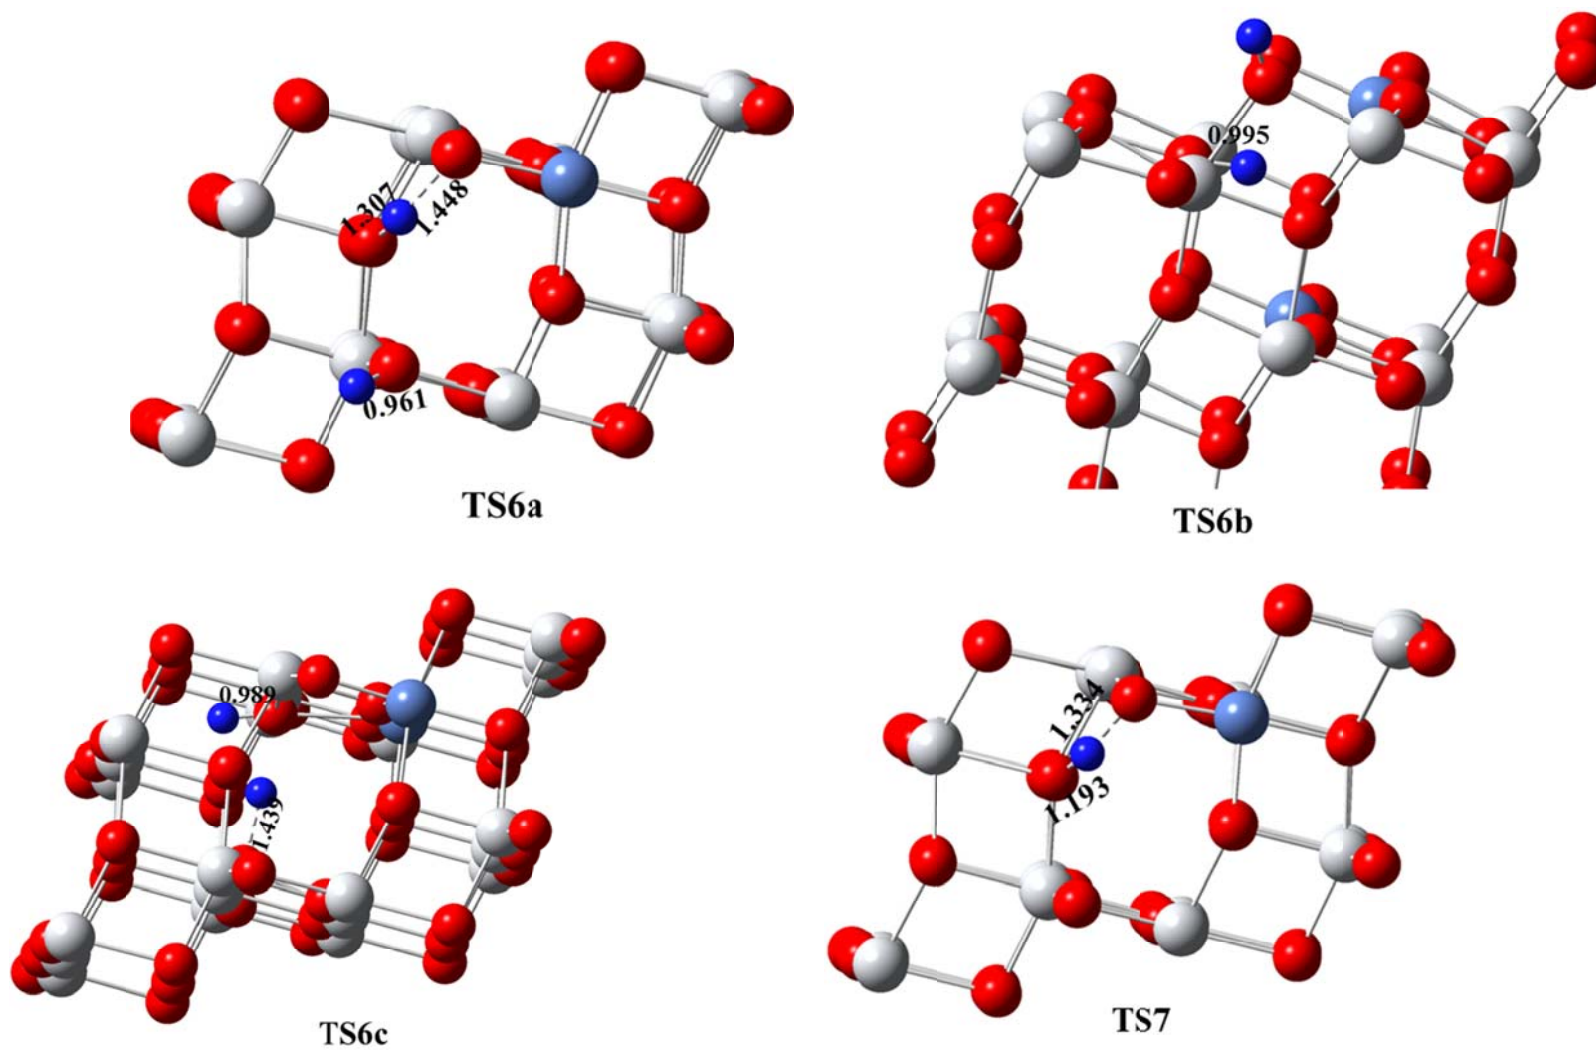

**Figure S5.** Optimized transition state configurations for H<sub>2</sub> dissociation and migration on (1 - 2) Ni-TiO<sub>2</sub>. (Grey: Titanium; Red: Oxygen; Royal Blue: Nickel; Blue: Hydrogen). The distance (Å) between the surface and H are shown in the optimized structure.

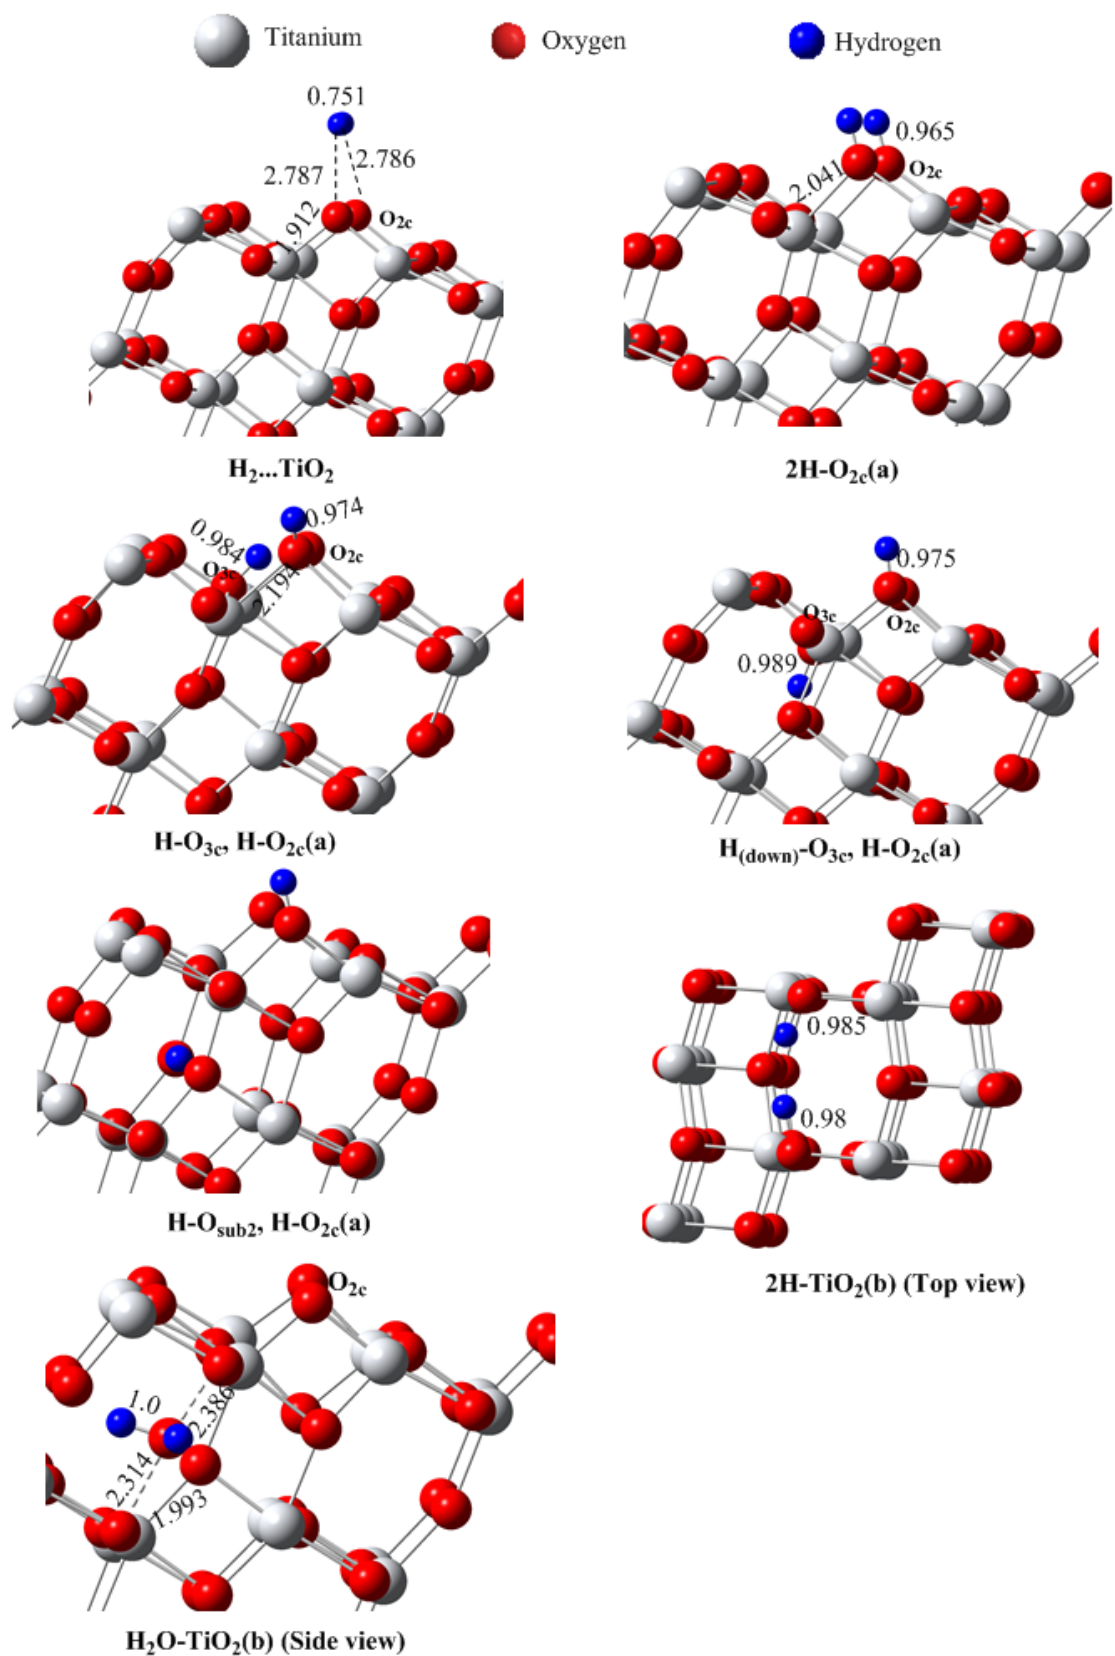

**Figure S6.** Optimized configurations of species from H<sub>2</sub> dissociation and migration from surface into to subsurface layers of the un-doped TiO<sub>2</sub> anatase presented in Figure 3a.



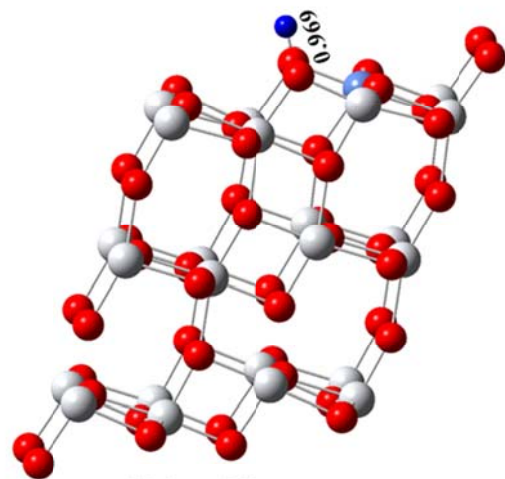

$\text{H-O}_{2\text{C}}\text{-1Ni-TiO}_2(\text{a})$

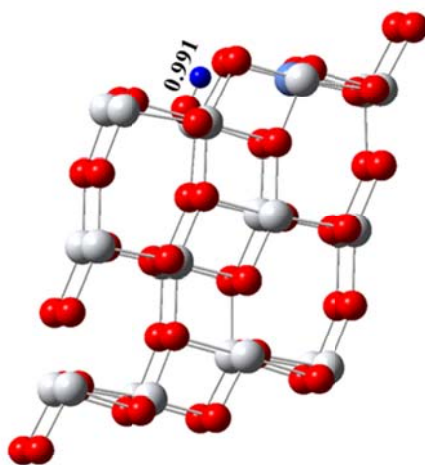

$\text{H-O}_{3\text{C}}\text{-1Ni-TiO}_2(\text{a})$

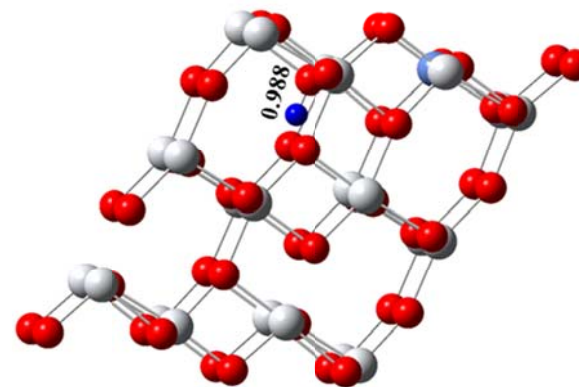

$\text{H}_{\text{BD1}}\text{-1Ni-TiO}_2(\text{a})$

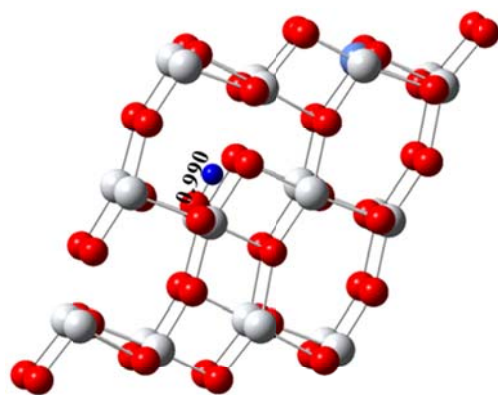

$\text{H}_{\text{BD2}}\text{-1Ni-TiO}_2(\text{a})$

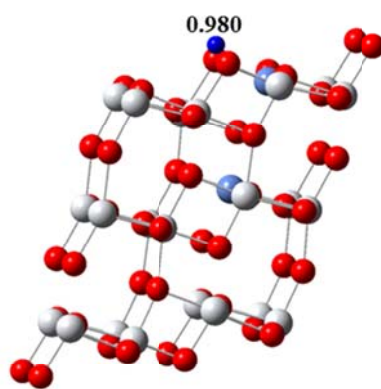

$\text{H-O}_{2\text{C}}\text{-2Ni-TiO}_2(\text{a})$

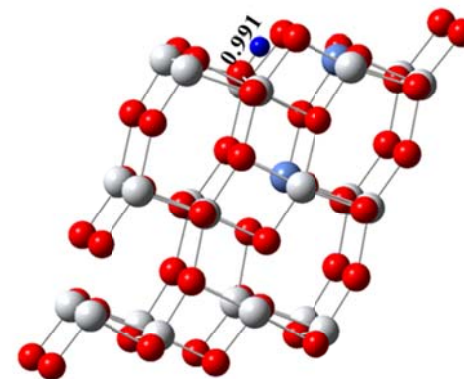

$\text{H-O}_{3\text{C}}\text{-2Ni-TiO}_2(\text{a})$

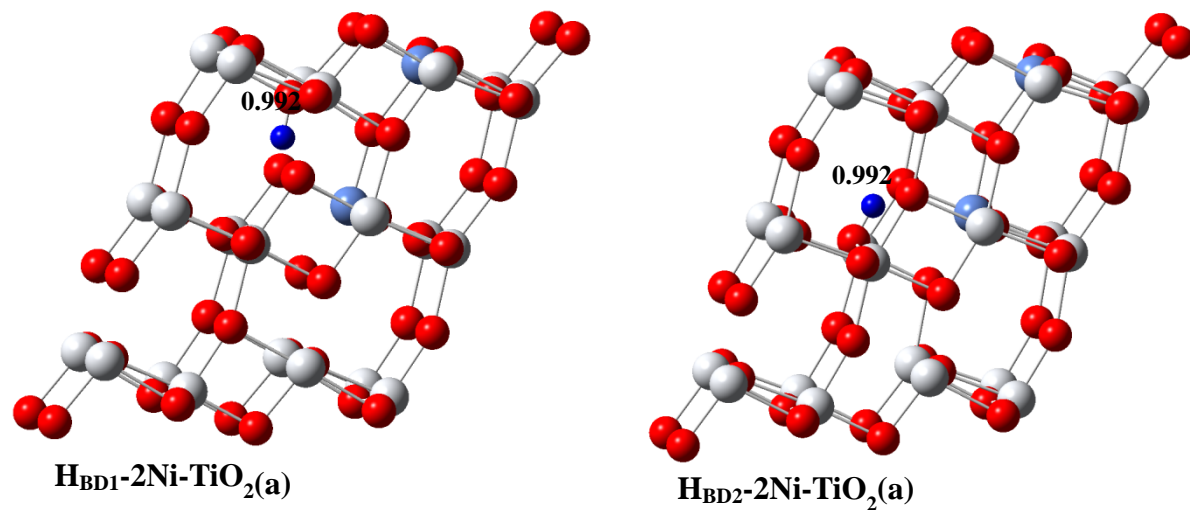

**Figure S7.** Optimized configurations of H-species on (1 - 2) Ni-TiO<sub>2</sub> surfaces and in their bulks (Grey: Titanium; Red: Oxygen; Royal Blue: Nickel; Blue: Hydrogen). The distance (Å) between the surface and H are shown in the Figure.

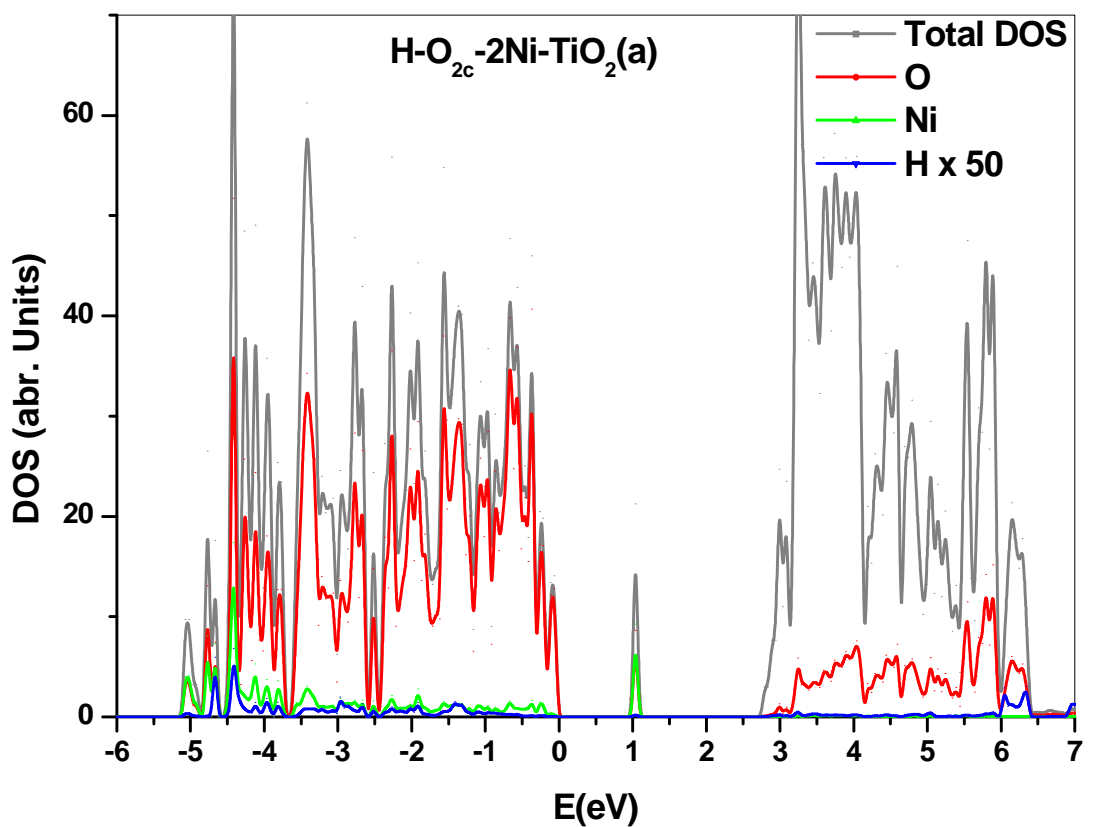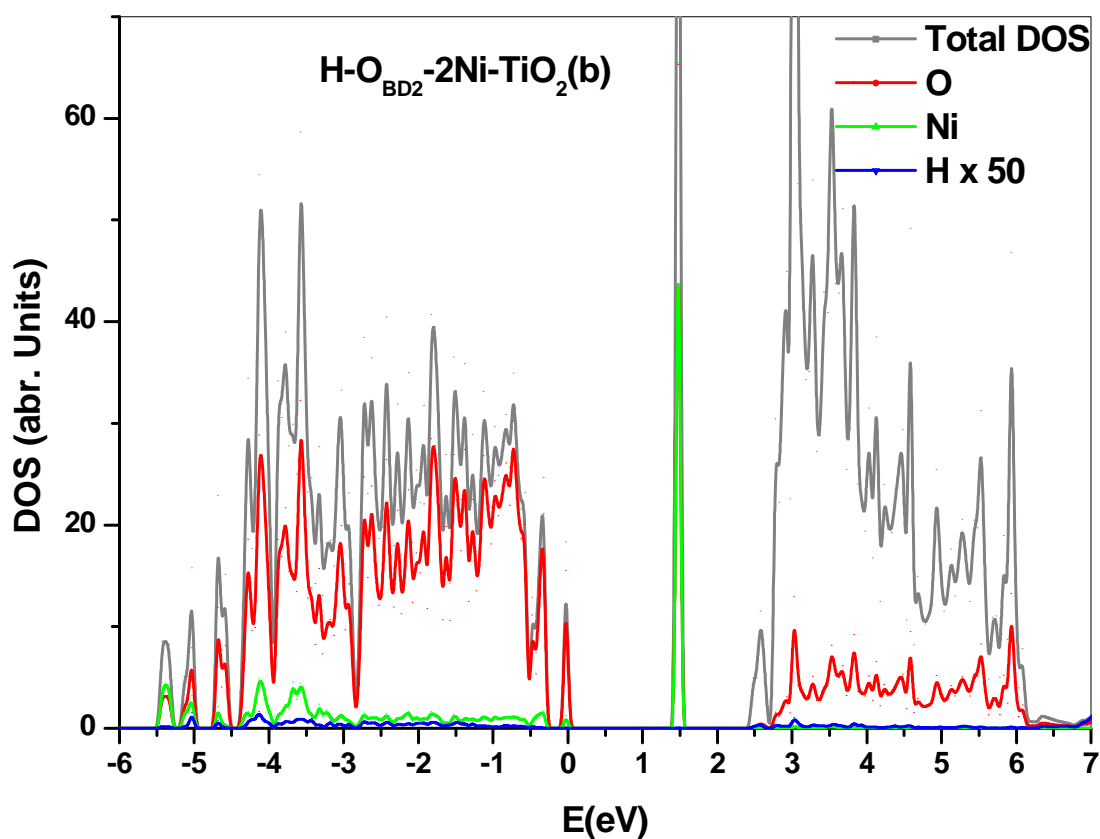

**Figure S8.** Densities of states (DOS) for the H atom bonding with O at the surface  $O_{2c}$  site of  $2Ni-TiO_2$  ( $H-O_{2c}-2Ni-TiO_2(a)$ ) and the H atom bonding with O in the bulk  $O_{sub3}$  site of  $2Ni-TiO_2$  ( $H-O_{sub3}-2Ni-TiO_2(b)$ ) calculated at the DFT + U level ( $U = 4.0$  eV for Ni and Ti) (for clarity, H and Ni PDOS peaks are magnified). Their optimized geometries and Bader charges are shown in Fig S7 and S9, respectively.

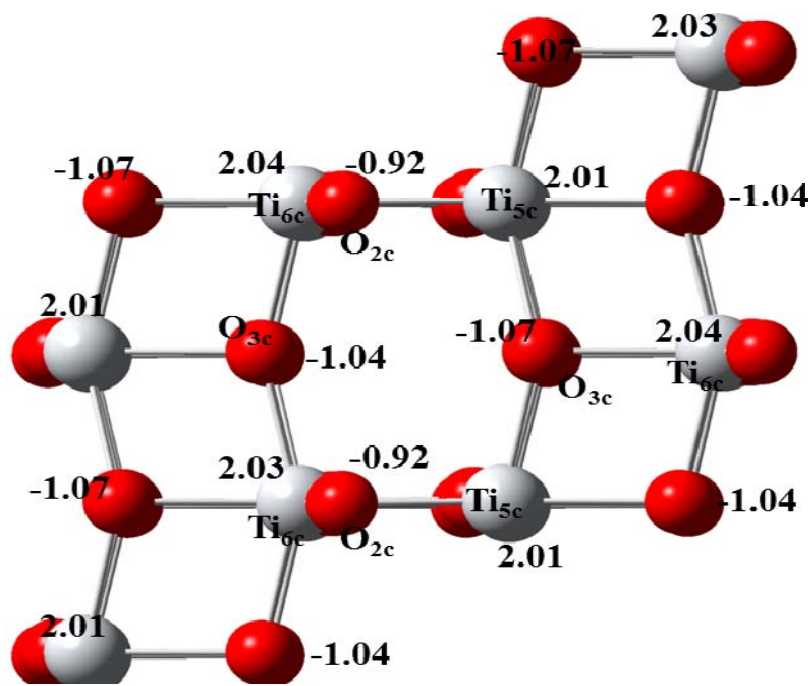

a)  $\text{TiO}_2$  (Top View)

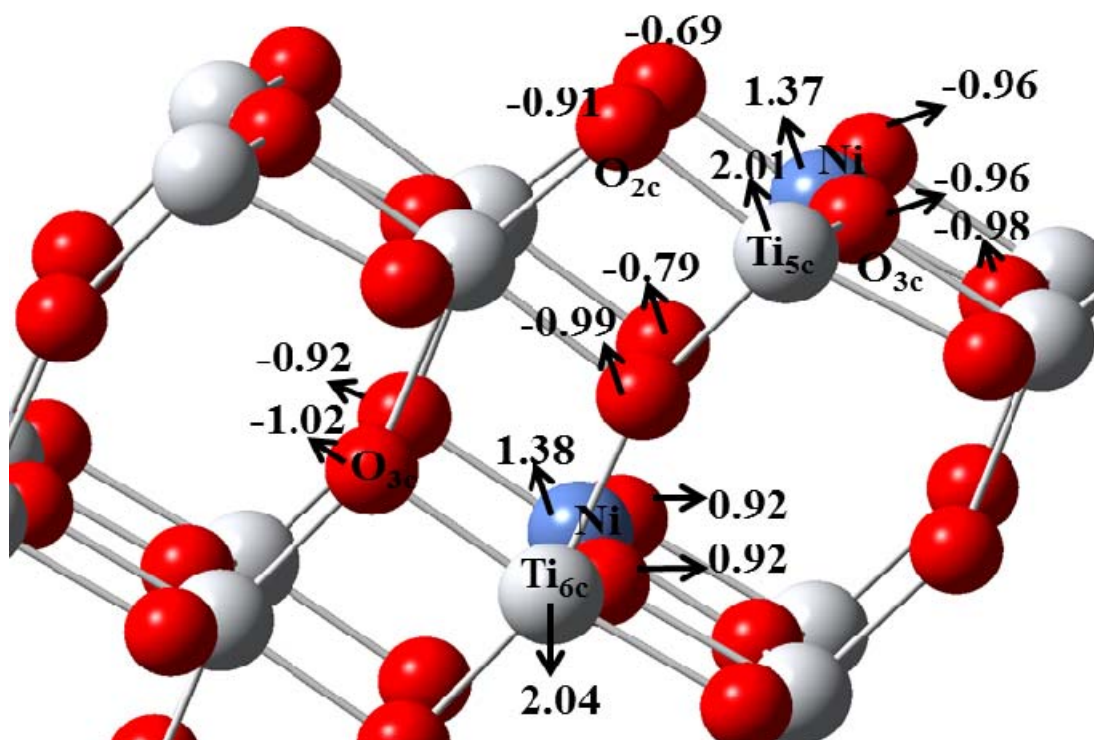

b)  $2\text{Ni-TiO}_2$



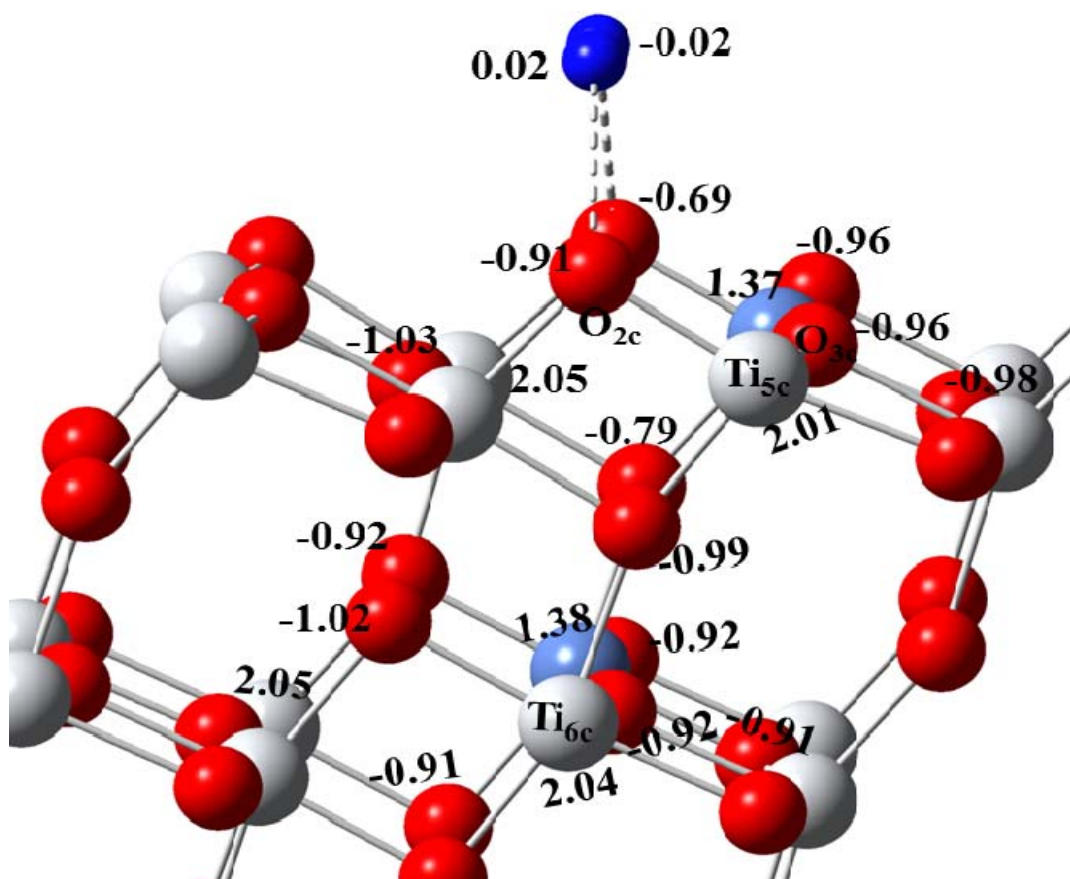

c) H<sub>2</sub>...O<sub>2c</sub>-2Ni

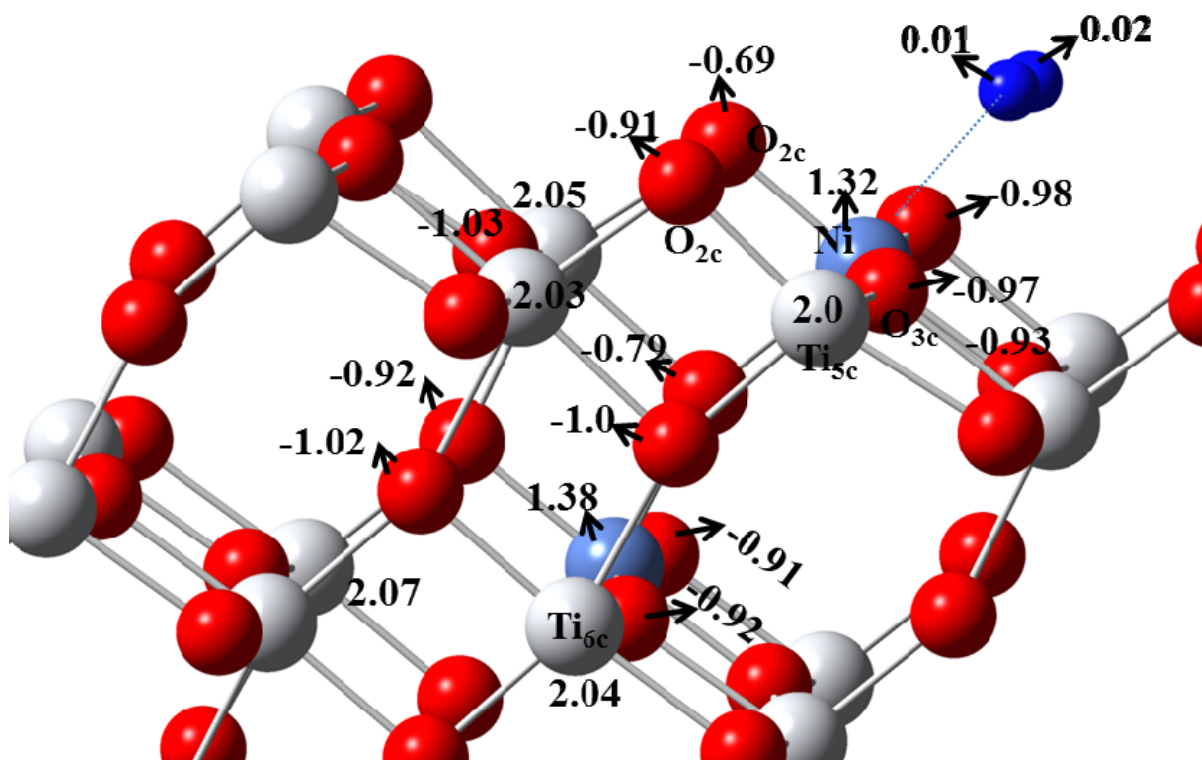

d) H<sub>2</sub>...2Ni-TiO<sub>2</sub>

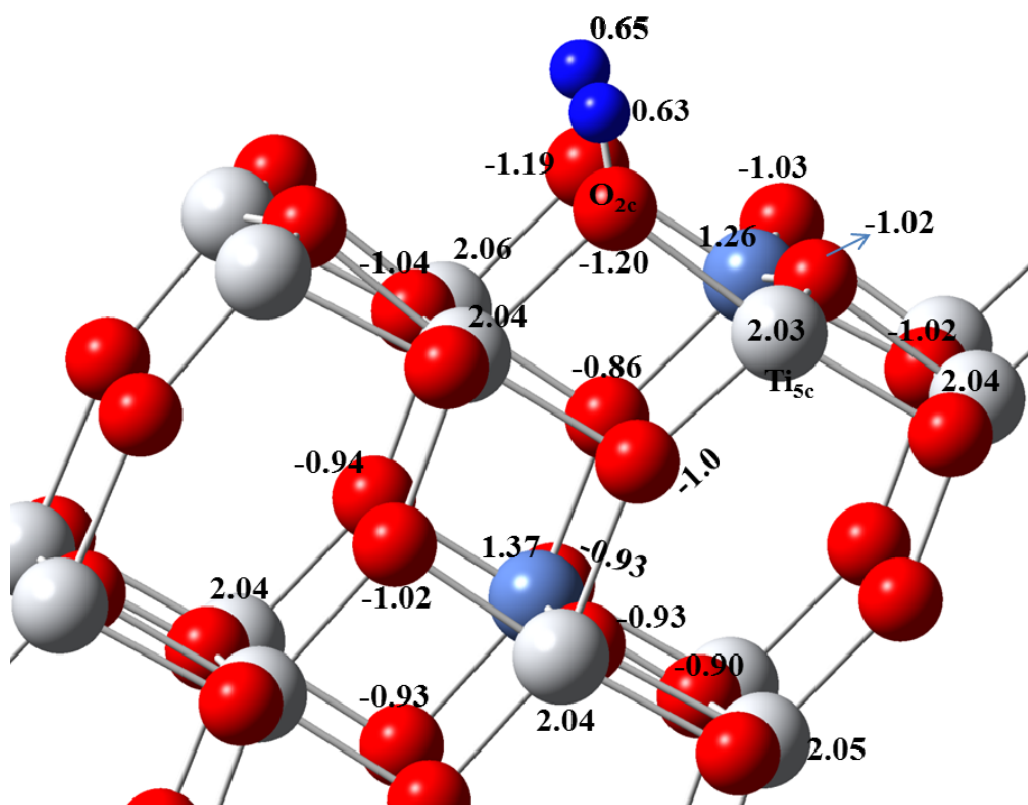

e) 2H-O<sub>2c</sub>-2Ni(a)

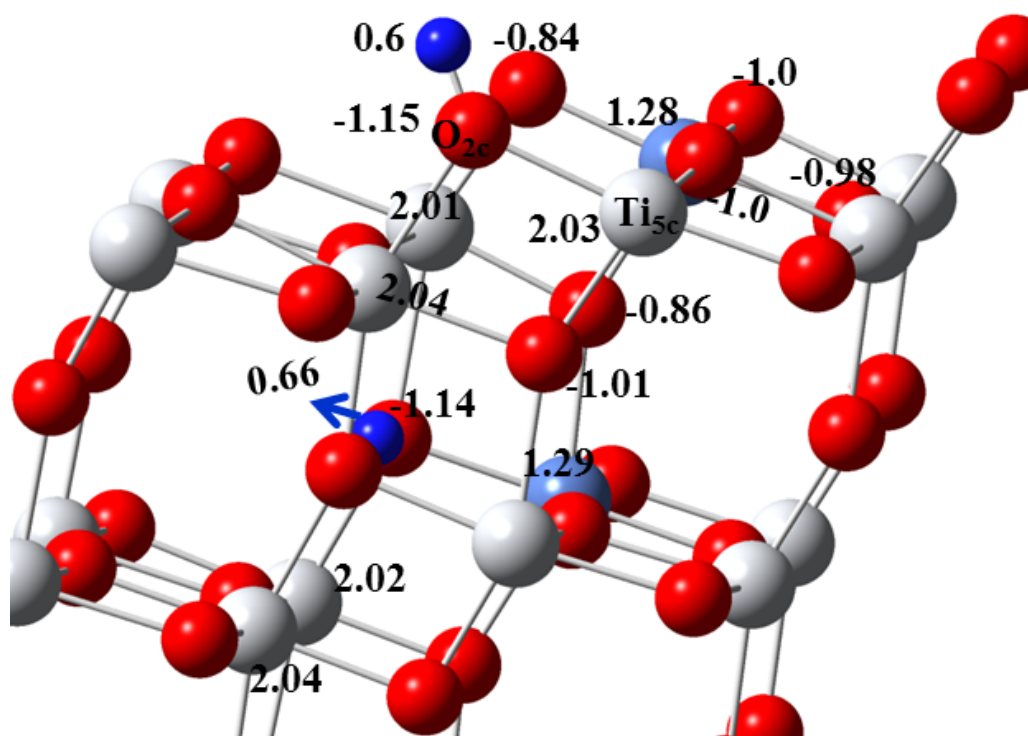

f) H-O<sub>sub2</sub>, H-O<sub>2c</sub>-2Ni(a)

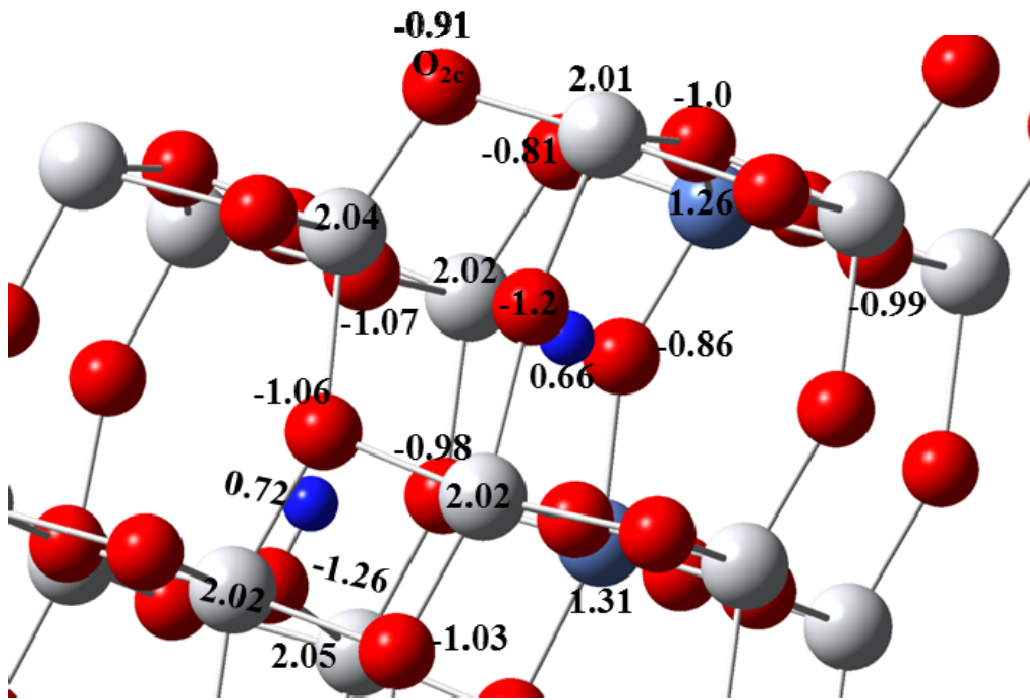

g) 2HO-2Ni(b)

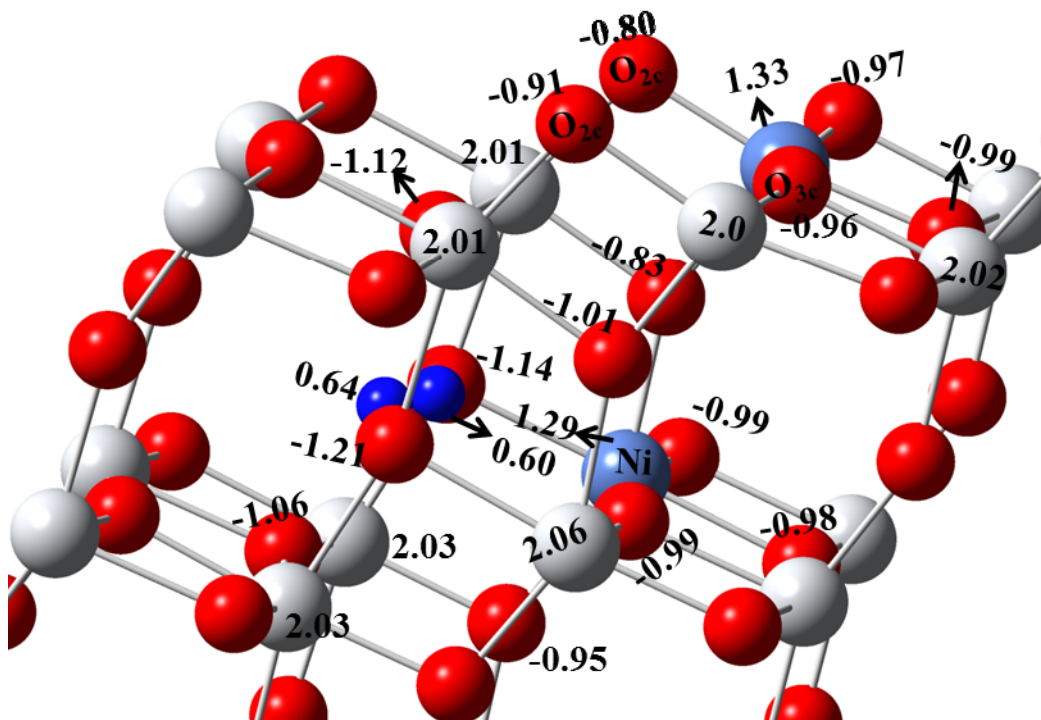

h) 2H-O<sub>sub2</sub>-2Ni(b)

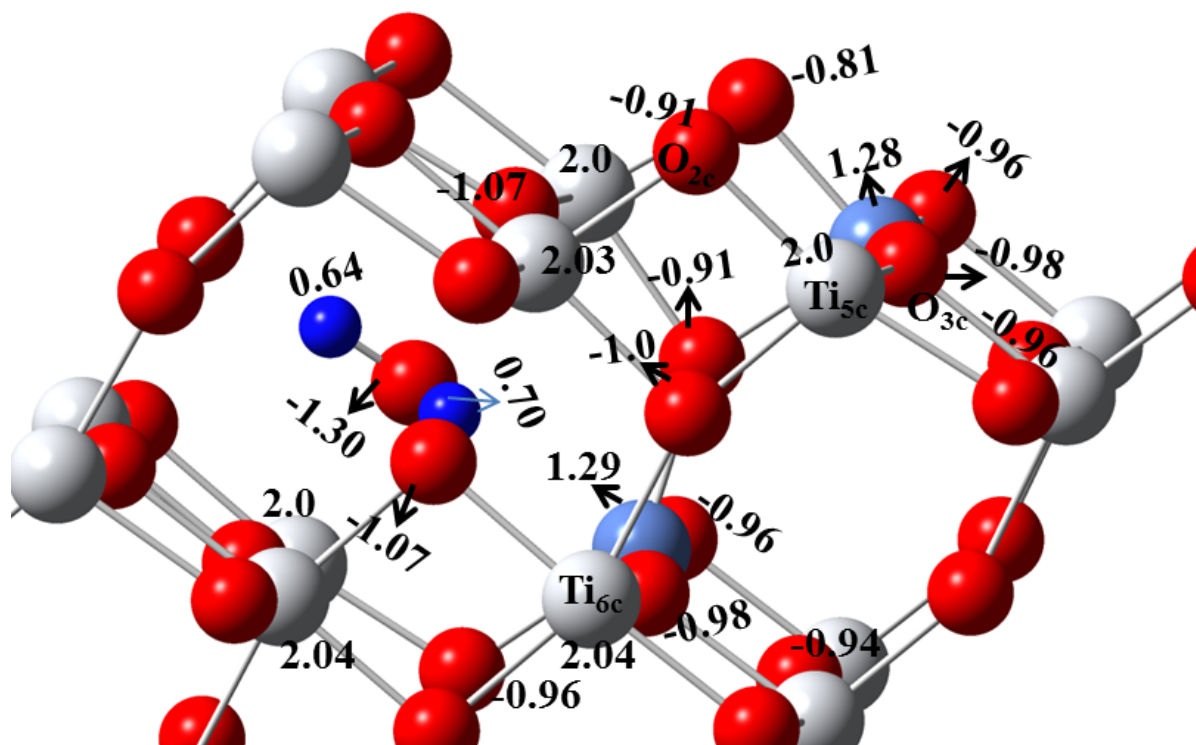

i) H<sub>2</sub>O-2Ni(b)

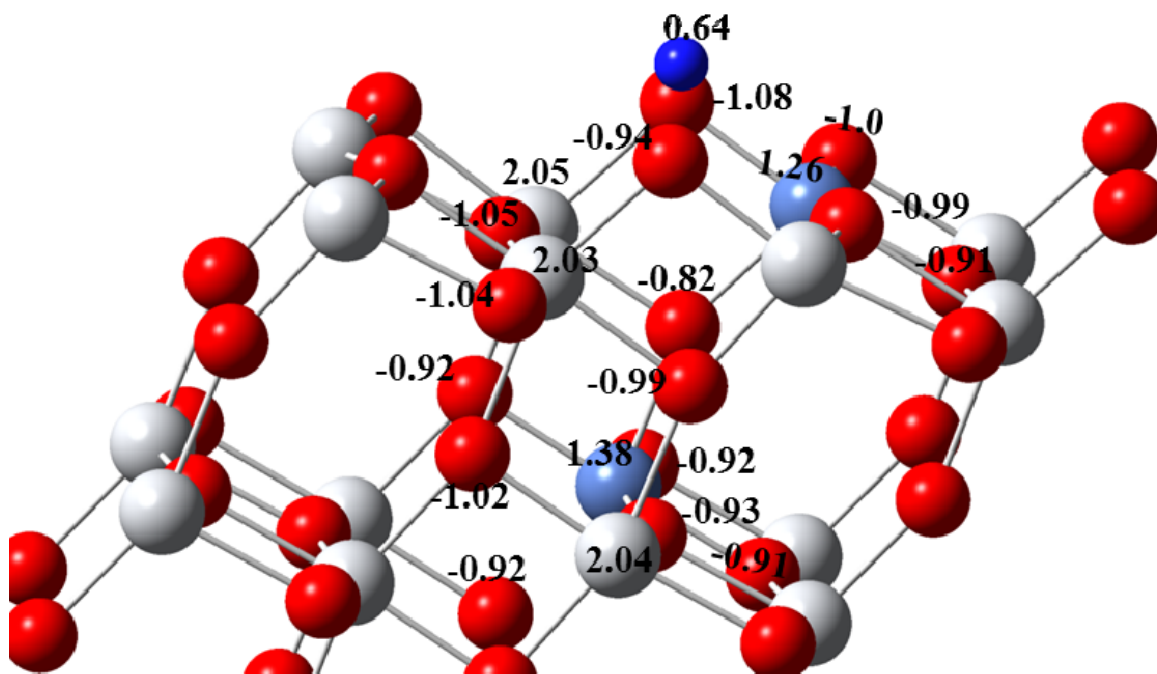

j) H-O<sub>2c</sub>-2Ni(a)

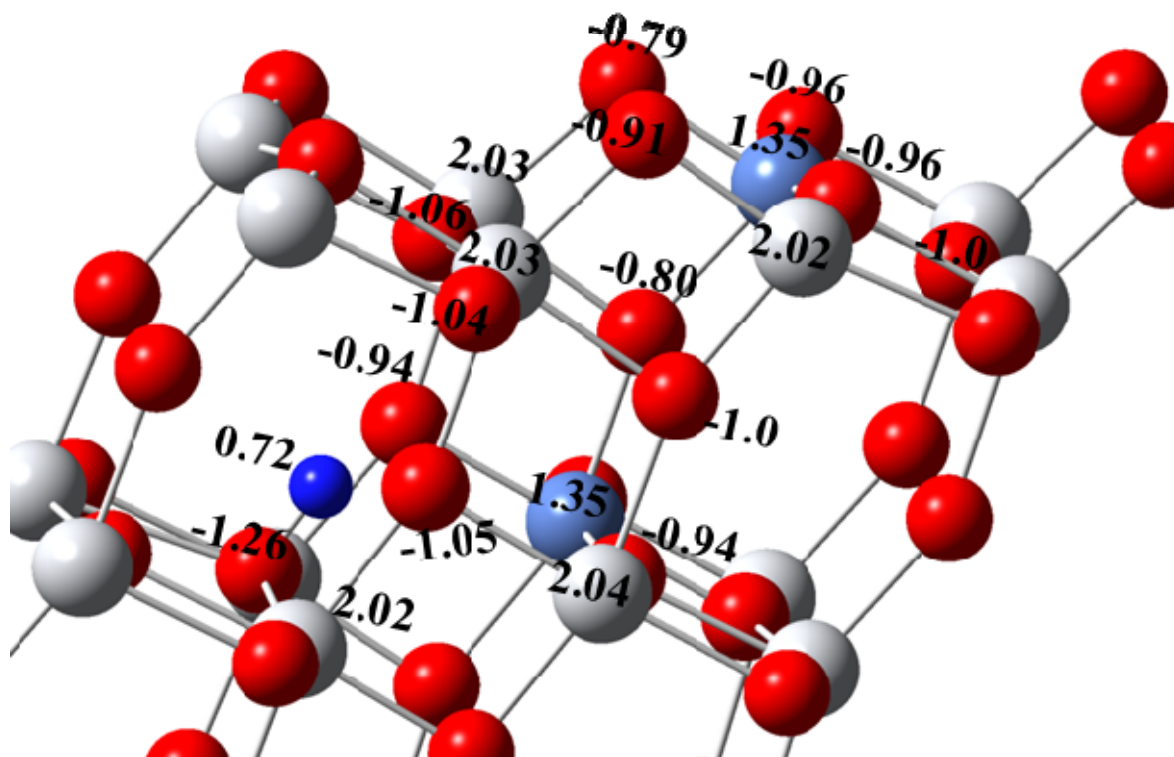

k) H-O<sub>sub3</sub>-2Ni(b)

**Figure S9.** Bader atomic charges ( $e$ ) for H, H<sub>2</sub> and H<sub>2</sub>O adsorbed on the surface and/or subsurface layers of 2Ni-doped TiO<sub>2</sub> along with those of the clean TiO<sub>2</sub>.
